# Supplementary material
Source: Research Square preprint supplement (doi:10.21203/rs.3.rs-9722306/v1)
Supplement: Supplementary file 1 [file 77bb7674c42a3f34c1b2b0b6.docx]

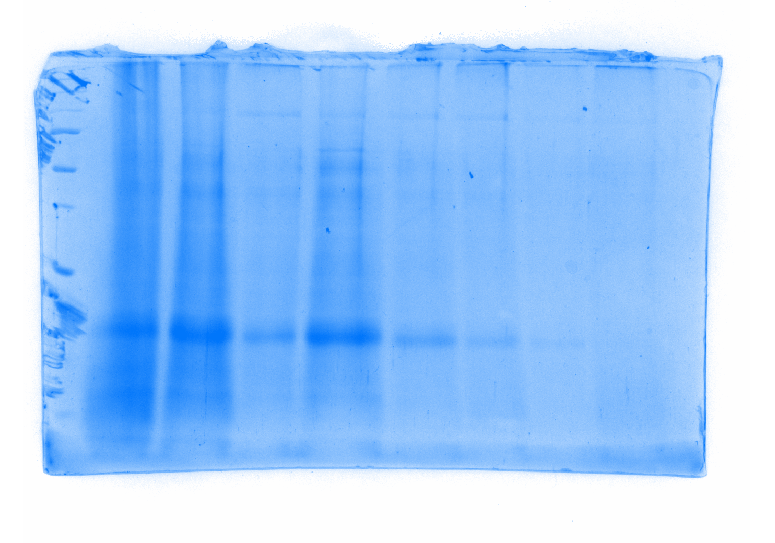


**2 3 4 5 6 7 8 9**

**
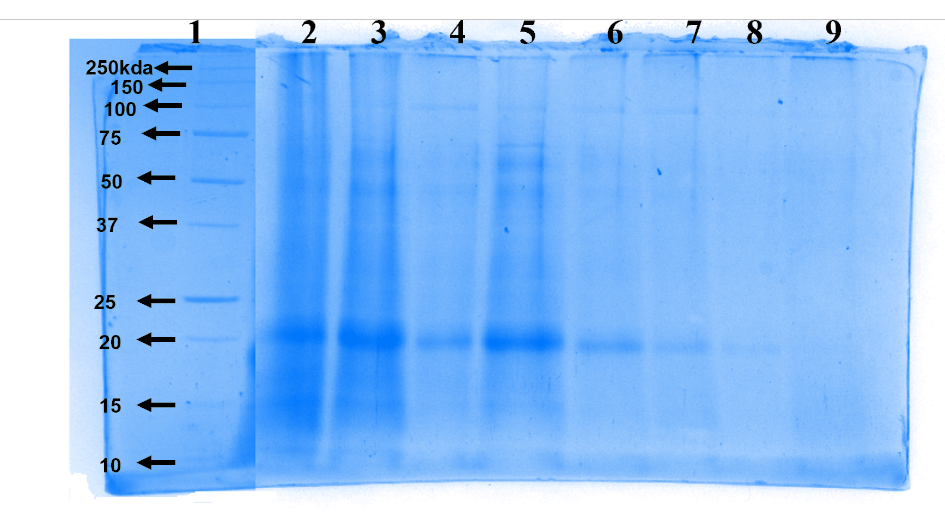
**

**SDS–PAGE revealed a prominent protein band corresponding to approximately 20 kDa, confirming the presence of phycoerythrin. Lane 1: protein marker; lane 2: crude extract; lane 3: flow-through; lane 4: PBS wash; lane 5: eluent 1; lane 6: eluent 2; lane 7: eluent 3; lane 8: eluent 4; lane 9: NaOH wash. The distinct band observed in the elution fractions indicates successful purification of PE.**
